# Supplementary material for: Quantifying platinum binding on protein-functionalized magnetic microparticles using single particle-ICP-TOF-MS
Source: Royal Society of Chemistry journal article supplement (doi:10.1039/d4ay00268g), 2024-01-01
Supplement: d4ay00268g1.pdf [file d4ay00268g1.pdf]

**Supporting Information**

**Quantifying Platinum Binding on Protein-Functionalized Magnetic Microparticles  
using Single Particle-ICP-TOF-MS**

Veronica C. Bradley<sup>1</sup>, Benjamin T. Manard<sup>1\*</sup>, Lyndsey Hendriks<sup>2</sup>, Daniel R. Dunlap<sup>1</sup>, Amber N.  
Bible<sup>3</sup>, Ada Sedova<sup>3</sup>, Patricia Saint-Vincent<sup>3</sup>, Brian C. Sanders<sup>3</sup>, and Hunter B. Andrews<sup>4\*</sup>

<sup>1</sup>Chemical Sciences Division, Oak Ridge National Laboratory, Oak Ridge, TN

<sup>2</sup>Tofwerk AG, Thun, Switzerland

<sup>3</sup>Biological Sciences Division, Oak Ridge National Laboratory Oak Ridge, TN

<sup>4</sup>Radioisotope Science and Technology Division, Oak Ridge National Laboratory Oak Ridge, TN

\*Corresponding authors: H.B. Andrews, [andrewshb@ornl.gov](mailto:andrewshb@ornl.gov)  
B.T. Manard, [manardbt@ornl.gov](mailto:manardbt@ornl.gov);

Figures: 3

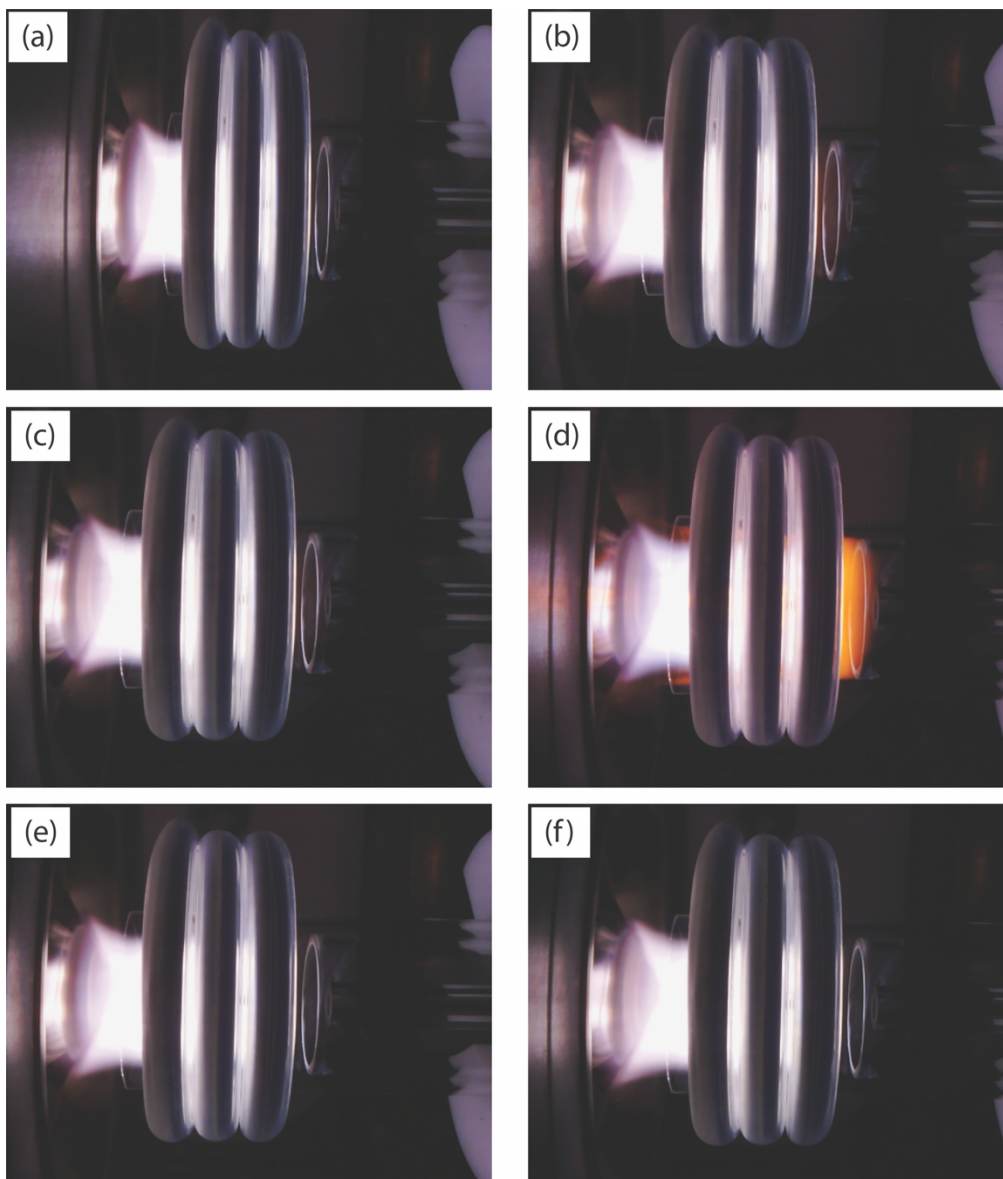

**Figure S1.** Images of ICP torches as a function matrix: (a) ammonium acetate, (b) MOPS, (c) 0.1M PBS, (d) 1M PBS, (e) HEPES, and (f) HNO<sub>3</sub>.

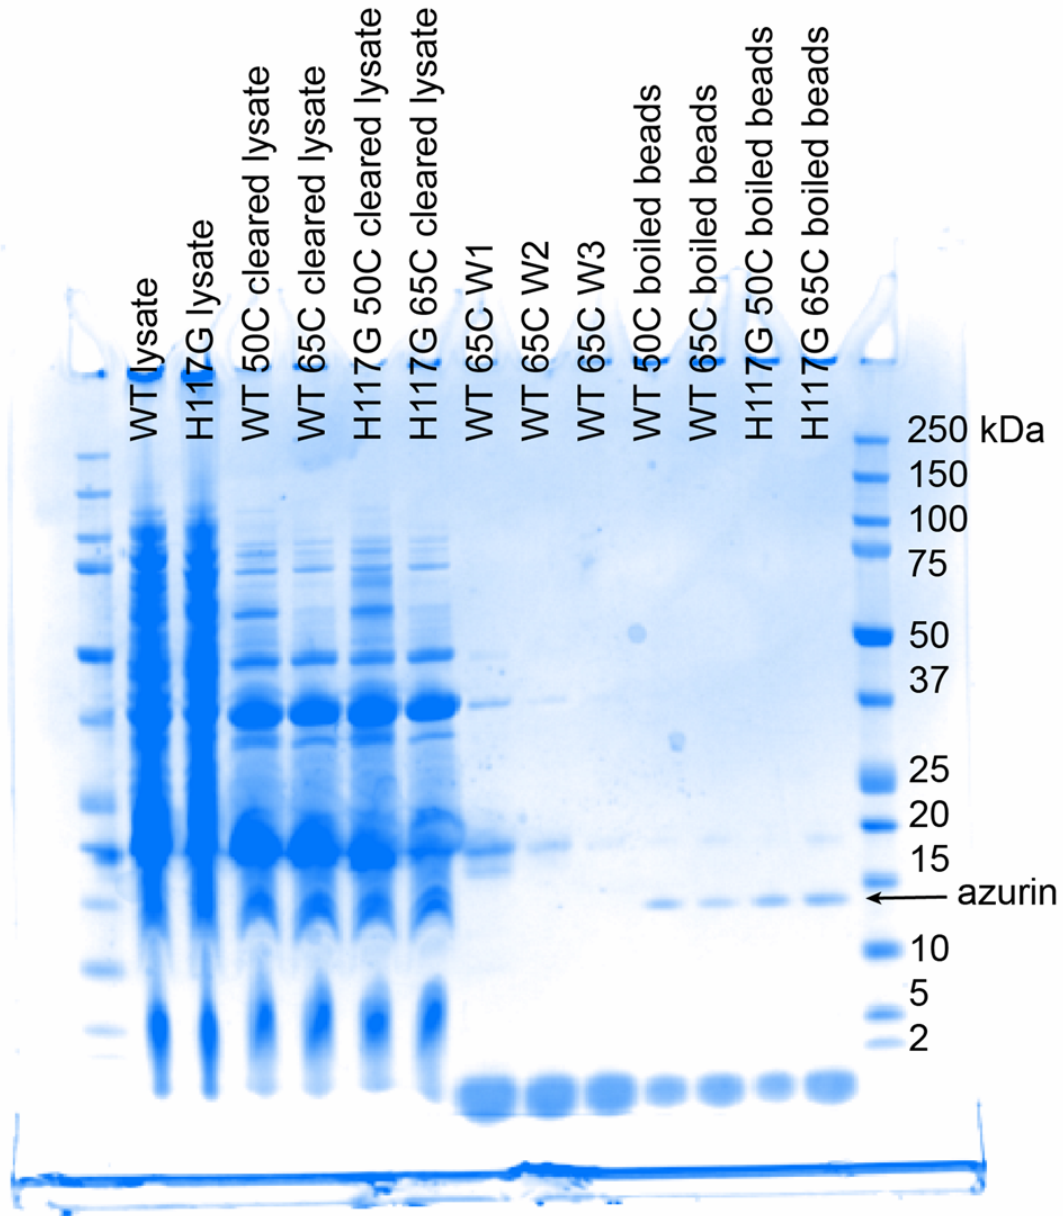

**Figure S2.** SDS-PAGE analysis of azurin expression and bead loading. Each lane is labeled with contents loaded on the gel and conditions of each sample prior to SDS-PAGE. Azurin proteins were shown to specifically bind to SA-coated beads and were released upon boiling. WT azurin was expressed parallel to H117G to ensure the point mutation did not impact protein expression.

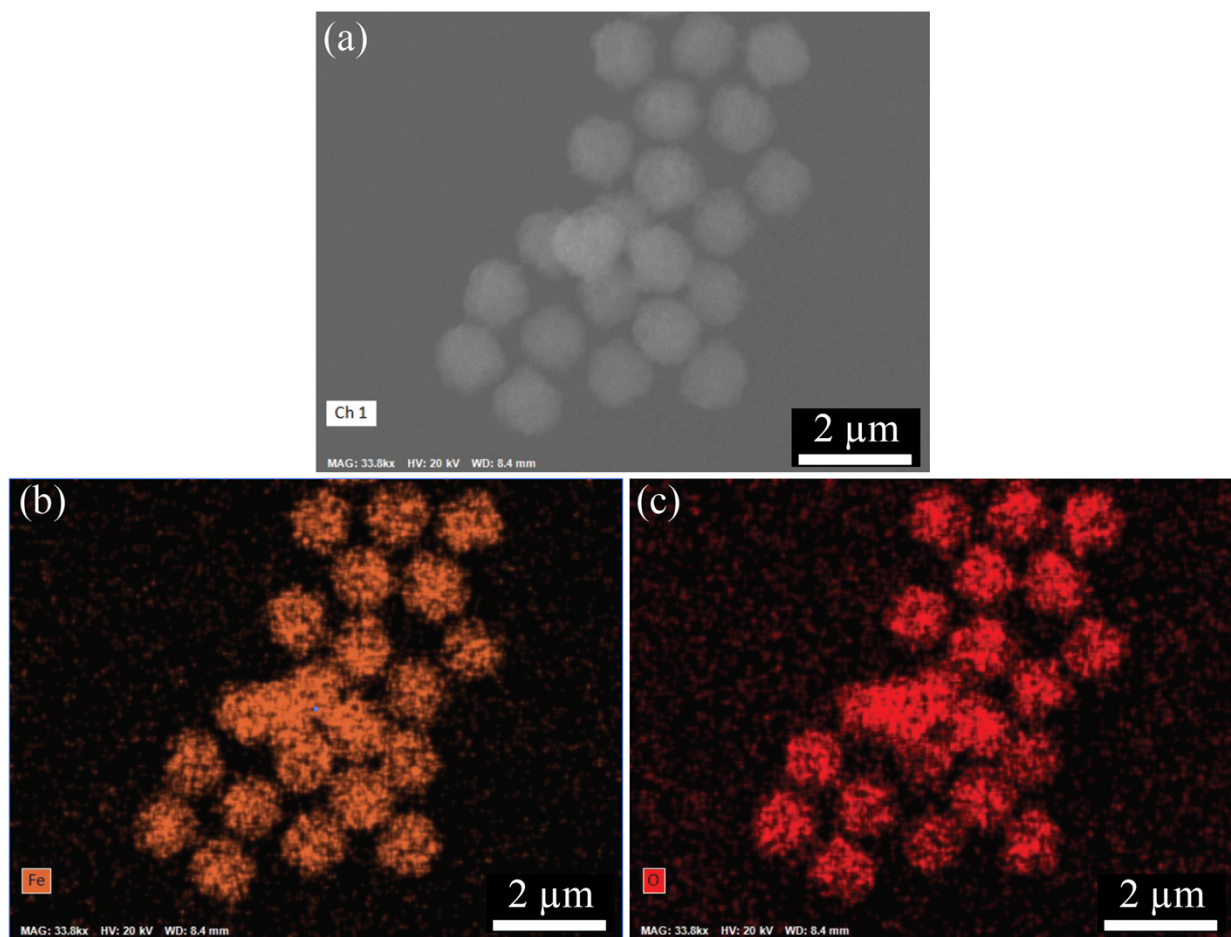

**Figure S3.** SEM-EDS maps of magnetic microparticles.
